# Supplementary material for: Initial insights from a global database of rainfall-induced landslide inventories: the weak influence of slope and strong influence of total storm rainfall
Source: Copernicus journal article supplement (doi:10.5194/esurf-6-903-2018), 2018-10-10
Supplement: Supplementary file 2 [file esurf-6-903-2018-supplement.zip]

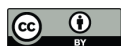

## *Supplement of*

# **Initial insights from a global database of rainfall-induced landslide inventories: the weak influence of slope and strong influence of total storm rainfall**

**Odin Marc et al.**

*Correspondence to:* Odin Marc ([odin.marc@unistra.fr](mailto:odin.marc@unistra.fr))

- [esurf-6-903-2018-supplement-title-page.pdf](#)
- [Rainfall\\_Japan2011.csv](#)
- [Rainfall\\_Taiwan2008.csv](#)
- [Rainfall\\_Taiwan2009.csv](#)
- [template\\_Suppl.pdf](#)

The copyright of individual parts of the supplement might differ from the CC BY 4.0 License.
